# Supplementary material
Source: PubMed Central journal article supplement (PMC5820712)
Supplement: jama-318-1767-s002.pdf [file jama-318-1767-s002.pdf]

2  
3  
4  
5  
6  
7  
8  
9  
10  
11  
12



UK Fixation of Distal Tibia Fractures

13

## STATISTICAL ANALYSIS PLAN

14 UK FixDT: UK **Fix**ation of **D**istal **T**ibia Fractures

15  
16 Authors : James Griffin  
17 : Nick Parsons  
18

19  
20  
21 Version: 3.1

22 Date completed: 17<sup>th</sup> July 2015

23 Finalised and seen by Chief Investigator: 6<sup>th</sup> August 2015  
24  
25  
26  
27

28  
29  
30  
31  
32  
33  
34  
35  
36  
37  
38  
39  
40  
41  
42  
43  
44  
45  
46  
47  
48  
49  
50  
51

**Ethical approval**

NRES Committee West Midlands - Coventry & Warwickshire, 06 November 2012, REC  
Reference: 12/WM/0340

**Funding**

Health Technology Assessment  
Ref number 11/136/04

**Sponsorship**

This study is jointly sponsored by the University of Warwick and University Hospitals  
Coventry and Warwickshire NHS Trust.

**Registration**

The study is registered with the current controlled trials database under reference  
number ISRCTN99771224

**Dates**

Study start date: 01/03/2013  
Study end date: 28/02/2017

52  
53  
54

**1. CONTENTS**

|           |                             |                     |
|-----------|-----------------------------|---------------------|
| <b>1.</b> | Contents                    | <del>3</del><br>55  |
| <b>2.</b> | Contact Details             | <del>4</del><br>56  |
| <b>3.</b> | Background                  | <del>6</del><br>58  |
| <b>4.</b> | Protocol Summary            | <del>7</del><br>59  |
| <b>5.</b> | Data Monitoring             | <del>11</del><br>60 |
| <b>6.</b> | Statistical Analysis        | <del>13</del><br>61 |
| <b>7.</b> | CONSORT Diagram             | <del>18</del><br>62 |
| <b>8.</b> | Template tables and figures | <del>19</del><br>64 |
| <b>9.</b> | Amendments                  | <del>33</del><br>65 |
|           |                             | 67                  |
|           |                             | <del>33</del><br>68 |
|           |                             | 69                  |

70  
71  
72  
73  
74  
75  
76  
77  
78  
79  
80  
81  
82  
83  
84  
85  
86

87 **2. CONTACT DETAILS**

88

89 Chief Investigator

90 Professor Matthew Costa

91 Warwick CTU

92 Gibbet Hill Campus

93 Coventry

94 CV4 7AL

95 Matthew.Costa@warwick.ac.uk

96

97 **Trial Coordinator**

98 Mrs Anne-Marie Brennan

99 Warwick CTU

100 Gibbet Hill Campus

101 Coventry

102 CV4 7AL

103 02476 572905

104 A-M.Brennan@warwick.ac.uk

105

106 **Senior Research Fellow**

107 Dr Juul Achten

108 Clinical Sciences Research Laboratories

109 Clifford Bridge Road

110 Coventry, CV2 2DX

111 02476 968614

112 J.Achten@warwick.ac.uk

113

114

115

116

117

118

119

120

121

122

123 **Trial Management Group**

124 Prof Matthew Costa - CI Trauma and Orthopaedic Surgeon

125 Dr Juul Achten - Senior Research Fellow

126 Dr Anne-Marie Brennan -Trial Co-ordinator

127 Mrs Susie Hennings - Senior Project Manager

128 Dr Nick Parsons - Statistics

129 Prof Stavros Petrou - Health Economics

130 Mr James Griffin – Trial Statistician

131 Prof Sallie Lamb - Co-Director of the Oxford Clinical Trials Research Unit

132 **Trial Steering Committee**

133 Prof James Mason (Chair)

134 Prof Simon Donell (Independent member)

135 Mr Tim Chesser (Independent member)

136 Prof Matthew Costa (Chief Investigator)

137 Prof Sallie Lamb (Warwick Clinical Trials Unit)

138 Dr Anne-Marie Brennan (Trial Co-ordinator)

139 Dr Nick Parsons (Trial Statistician)

140 Prof Stavros Petrou (Trial health economist)

141 Mrs Ceri Jones (Sponsor representative, manager R&D UHCW)

142 Prof Ian Pallister (Lead Surgeon at recruiting site)

143 Mrs Suzanne Jones (Lay independent member)

144

145 **Data monitoring committee**

146 Ms Dawn Teare (Chair, Statistician)

147 Mr Richard Gibson (Clinician)

148 Mrs Smitaa Patel (Statistician)

149

150

151

152

153

154

155

156

157 **3. BACKGROUND**

158

159 A comprehensive summary of the background to the trial can be found in the **FixDT**  
160 **protocol.**

161

162 The tibia is the most commonly broken major bone in the leg. Injuries usually require  
163 hospital admission, frequently require surgery and result in prolonged periods  
164 (months) away from work and social activities.

165

166 The treatment of displaced, extra-articular fractures of the distal tibia (lower third)  
167 remains controversial. These injuries are difficult to manage due to the limited soft  
168 tissue cover, poor vascularity of the area and proximity of the fracture to the ankle  
169 joint. Infections, non-union and malunion are well-recognised complications.

170

171 Surgical treatment options include locked intramedullary nails, plate and screw  
172 fixation and external fixator systems including the Ilizarov frame and hybrid fixators.  
173 External fixators may be beneficial in selected cases – particularly those with severe  
174 soft-tissue injuries - but the **nail and plate options are the most common in the UK.**  
175 Mid-shaft fractures of the tibia are generally successfully treated with locked  
176 intramedullary nails. However, in the more distal metaphyseal region of the tibia the  
177 fixation may be less stable. The nail or screws which are inserted into the nail may  
178 break, mal-alignment may occur and there is a risk that the nail will penetrate into  
179 the ankle joint.

180

181 A recent pilot RCT of locking plate versus medullary nail fixation involving 24 patients  
182 with isolated extra-articular fractures of the distal tibia, using the Disability Rating  
183 Index (DRI) at 6 months as the primary outcome, found some evidence in favour of  
184 the intramedullary nail group. This pilot study provided compelling evidence to  
185 support the development of a definitive randomised trial in multiple centres.

186

187

188

189

190

191  
192  
193  
194  
195  
196  
197  
198  
199  
200  
201  
202  
203  
204  
205  
206  
207  
208  
209  
210  
211  
212  
213  
214  
215  
216  
217  
218  
219  
220  
221  
222  
223

**4. PROTOCOL SUMMARY**

**4.1 Trial summary**

The project is a **two-phased study. Phase 1 (Feasibility phase)** assessed the feasibility of running a large-scale multi-centre randomised controlled trial in this complicated area of trauma research. **Phase 2 (Main phase)** will undertake the proposed randomised controlled trial in a minimum of 18 trauma centres across the UK.

Feasibility

The pilot will take place in **6 centres over a period of 6 months**. The main aim of this initial phase will be to determine the number of eligible and recruited patients in the trauma centres over the course of 6 months. Screening logs will be kept at each site to determine the number of patients assessed for eligibility and reasons for any exclusion. In addition, the number of eligible and recruited patients, and the number of patients who decline consent/withdraw, will be recorded.

Main RCT

All adult patients presenting at the trial centres with an isolated, acute fracture of the distal tibia are potentially eligible to take part in the trial. The broad eligibility criteria will ensure that the results of the study can readily be generalised to the wider patient population.

Randomisation will be implemented and administered using a secure web-based service at the clinical trial unit (CTU) at Warwick Medical School (University of Warwick). A minimization algorithm (sometimes referred to as adaptive randomization) will be used to randomise study participants; at recruitment of each new study participant this algorithm attempts to balance the marginal totals for each level of the stratification factors (**age** and **recruiting centre**). This is the usual practice for trials run at Warwick CTU. Experience indicates that for studies where some centres recruit only a relative small number of patients this method tends to perform better than conventional stratification methods.

224 **Randomisation will be on a 1:1** basis to either **intramedullary nailing** or **'locking'-**  
 225 **plate fixation**. Both of these operations are widely used within the NHS and all of the  
 226 surgeons in the chosen centres will be familiar with both techniques.

227  
 228 Baseline demographic data, radiographs and pre-injury functional data using the  
 229 DRI and the Olerud and Molander Questionnaire will be collected. The patients will  
 230 also be asked to fill out the EuroQol EQ-5D health-related quality of life questionnaire  
 231 to indicate their typical pre-injury health status.

232  
 233 A research associate will perform a clinical assessment and make a record of any  
 234 early complications at 6 weeks and a radiograph will be taken. A further clinical  
 235 assessment and radiograph will also be taken at 12 months post-operatively to  
 236 detect late complications. Functional outcome, health-related quality of life and  
 237 resource use questionnaires will be collected by post at 3 months, 6 months and 12  
 238 months post-operatively.

239  
 240 A total sample size of 264 patients represents the most likely scenario, based on our  
 241 current knowledge, assuming DRI is approximately normally distributed, the standard  
 242 deviation is 20 points and a clinically important difference of 8 points, with power set  
 243 at 90% and significance at 5%. Allowing a margin of 20% loss during follow-up, this  
 244 gives a figure of **320 patients in total**. Therefore, **160 patients randomized to each**  
 245 **group** will provide 90% power to detect a difference of 8 points in DRI at 6 months  
 246 with 90% power at the 5% level.

247  
 248 **4.2 Objectives**

249  
 250 The **primary objective** is:  
 251 To quantify and draw inferences on observed differences in the Disability Rating  
 252 Index (DRI) between the trial treatment groups at 6 months after injury.

253  
 254 The **secondary objectives** are:  
 255 1. To quantify and draw inferences on observed differences in early functional status  
 256 (measured by the DRI) at 3 months and later functional status at 12 months.  
 257 2. To quantify and draw inferences on observed differences in the radiological  
 258 outcomes: nonunion, mal-alignment and shortening.



- 259 3. To identify any differences in health-related quality of life between the trial  
 260 treatment groups in the first year after the injury.  
 261 4. To determine the complication rate of intramedullary nail fixation versus 'locking'-  
 262 plate fixation in the first year after the injury.  
 263 5. To investigate, using appropriate statistical and economic analytical methods, the  
 264 resource use, costs and comparative cost effectiveness of intramedullary nail fixation  
 265 versus 'locking'- plate fixation.

266

267 **4.3 Outcome measures**

268

269 **Table 1: Summary of outcome measures to be collected at each time point**

270

|               |                                                                                                                                                        |
|---------------|--------------------------------------------------------------------------------------------------------------------------------------------------------|
| 271 Baseline  | DRI OMAS, EQ-5D <i>pre-injury</i> , <u>EQ-5D current health status 'as of today'</u> , &<br>272 radiographs                                            |
| 273 6 weeks   | Complication records, radiographs and operative record                                                                                                 |
| 274 3 months  | DRI, OMAS, EQ-5D, record of complications/rehabilitation or other<br>275 interventions and resource use questionnaire                                  |
| 276 6 months  | <b>DRI (primary outcome)</b> , OMAS, EQ-5D, record of<br>277 complications/rehabilitation or other<br>278 interventions and resource use questionnaire |
| 279 12 months | DRI, OMAS, EQ-5D, radiographs, record of complications/rehabilitation or<br>280 other<br>281 interventions and resource use questionnaire              |
| 282 Annual    | Postal DRI, EQ-D5 and further treatment questionnaire (recording any<br>283 post-operative Questionnaire problems or treatments)                       |

284

285

286 The **primary outcome measure** for this study is the **Disability Rating Index (DRI)**. The  
 287 DRI score is a validated questionnaire which is self-reported (filled out by the patient).  
 288 It consists of 12 items specifically related to function of the lower limb. This data will  
 289 be collected at baseline, 3, 6 and 12 months post-operatively. The DRI has been  
 290 proven to be a robust and practical clinical research instrument with good  
 291 responsiveness and acceptability for assessment of disability caused by impairment  
 292 in the lower limb.

293

294 The **secondary outcome measures** in this trial are:

295 **Olerud and Molander Score (OMAS):** This is a self-administered patient questionnaire.  
 296 It is a good outcome tool for assessing symptoms after an ankle fracture. The score is  
 297 based on nine different items: pain, stiffness, swelling, stair climbing, running, jumping,

298 squatting, supports and work/activities of daily living. The scoring system correlates  
299 well with parameters considered to summarise the results after this type of injury and  
300 is therefore recommended for use in scientific investigations.

301 **EQ-5D (3L):** The EQ-5D is a validated, generic health-related quality of life measure  
302 consisting of 5 dimensions each with a 3-level answer possibility. Each combination of  
303 answers can be converted into a health utility score. It has good test-retest reliability,  
304 is simple for patients to use, and gives a single preference-based index value for  
305 health status that can be used for broader cost-effectiveness comparative purposes.

306 **Complications:** All complications will be recorded, including malunion, delayed/non-  
307 union, infection, wound complications, vascular and neurological injury and venous  
308 thrombo-embolism. A record will also be kept of any other surgery required in relation  
309 to the index fracture, including removal of any metalwork.

310 **Radiographic evaluation:** Standard anterior-posterior and lateral radiographs of the  
311 tibia and fibula will be taken at baseline, 6-weeks and 12 months after the injury.  
312 These radiographs are those routinely used for the investigation of patients with a  
313 suspected fracture of the distal tibia and for the follow-up of such patients following  
314 any intervention, so there will be no need to request any additional or special  
315 investigations.

316

317

318

319

320

321

322

323

324

325

326

327

328

329

330

331

332

333

334

335 **5. DATA MONITORING**

336

337 The Case Report Forms (CRFs) will be designed by the trial coordinator in conjunction  
338 with the trial management team. All electronic patient-identifiable information will  
339 be held on a secure, password-protected database accessible only to essential  
340 personnel. Paper forms with patient-identifiable information will be held in secure,  
341 locked filing cabinets within a restricted area of Warwick Medical School. Patients will  
342 be identified by a code number only. Direct access to source data/documents will  
343 be required for trial-related monitoring. All paper and electronic data will be  
344 retained for at least five years after completion of the trial.

345

346 Full details of management and checking of CRFs, x-rays, participant postal  
347 questionnaires and SAE forms are given in the **FixDT Data Management Plan**. For  
348 newly employed data administrators entering data the trial coordinator will perform  
349 a 100% data check of a minimum of 30 CRFs and questionnaires entered or until the  
350 error rate is less than 1%. A routine 10% check will be performed every month; the  
351 sample will be generated from the forms entered that month. If an error rate of over  
352 1% is found, then an additional sample will be taken. If a further 1% error rate is found,  
353 then a 100% check will be performed of the particular forms concerned.

354

355 Monitoring of the trial is a continual process, from the start to the end of the trial. The  
356 objectives of the statistical input during trial monitoring are to:

357

- Give an overview of the recruitment and follow-up
- Examine the quality of data
- Ensure the protocol is being adhered to
- Assess the randomisation sequence
- Statistical reporting

358

359

360

361

362

363 The Trial Steering Committee (TSC) and the Independent Data Monitoring  
364 Committee (DMC) are given the responsibility of monitoring the accumulating data.  
365 Statistical reports that provide oversight on the quality of the trial will be produced to  
366 cover the below issues. There are no planned interim analyses, unless requested by  
367 the DMC.

368  
369  
370  
371  
372  
373  
374  
375  
376  
377  
378  
379  
380  
381  
382  
383  
384  
385  
386  
387  
388  
389  
390  
391  
392  
393  
394  
395  
396  
397  
398  
399  
400  
401  
402  
403  
404  
405

The recruitment in the trial will be summarised regularly by the trial co-ordinator. Recruitment is continuously assessed by the trial co-ordinator, in conjunction with the statistician where appropriate, in order to check whether actual accrual is meeting projected targets, overall and by each centre.

The follow-up rates are based on postal questionnaire completion rates, and will be calculated regularly by the trial co-ordinator. Considerable efforts will be made by the trial team to keep in touch with patients throughout the trial to minimise loss to follow up. Rates will be calculated as follows:

% Follow-up rate (at time T) =

$$\frac{\text{Number of participants assessed at time } T}{\text{Total no.that should have been assessed at time } T} \times 100$$

Participants who have died before time T will not be counted in the denominator of rates. We expect a very small number of deaths during follow up. The follow-up rates will be computed at the following time-points:

- Follow-up at 3 months
- Follow-up at 6 months (primary outcome)
- Follow-up at 12 months
- Follow-up annual questionnaire, for up to 10 years

The template table (Table 4) given in Section 8: will be used to present the follow-up rates.

406  
407  
408  
409  
410  
411  
412  
413  
414

## **6. STATISTICAL ANALYSIS**

415  
416

### **6.1 Software**

417 When any analyses are required, data will be retrieved from the trial database by  
418 the trial statistician. The statistician will import data directly into an appropriate  
419 statistical package. All analyses and reporting will be conducted using either Stata or  
420 R (<http://www.r-project.org/>) using an ODBC (Open DataBase Connectivity) link; the  
421 version numbers of all software used, data files and all code will be made available to  
422 the Data Monitoring Committee (DMC) on request at any stage of the trial.  
423 Statistical results will be reported in accordance with CONSORT guidelines  
424 (<http://www.consort-statement.org/>).

425  
426

### **6.2 Data validation**

427 Prior to formal analysis, data will be checked for outliers, missing values and  
428 validated using the defined score ranges for all outcome measures. Queries will be  
429 reported to the trial coordinator and investigated. Standard statistical summaries  
430 (e.g. medians and ranges or means and variances, dependent on the distribution of  
431 the outcome) and graphical plots showing correlations will be presented for the  
432 primary outcome measure and all secondary outcome measures. Baseline data will  
433 be summarized to check comparability between treatment arms, and to highlight  
434 any characteristic differences between those individuals in the study, those ineligible,  
435 and those eligible but withholding consent.

436  
437

### **6.3 Missing data**

438 It seems likely that some data may not be available due to voluntary withdrawal of  
439 patients, lack of completion of individual data items or general loss to follow-up.  
440 Where possible the reasons for data 'missingness' will be ascertained and reported.  
441 Although missing data are not expected to be a problem for this study, the nature  
442 and pattern of the missingness will be carefully considered — including in particular

443 whether data can be treated as missing completely at random (MCAR). If judged  
 444 appropriate, missing data in the primary outcome (DRI) can be imputed using the  
 445 ICE (imputation by chain equation) procedure in Stata  
 446 ([www.ats.ucla.edu/stat/stata/library/ice.htm](http://www.ats.ucla.edu/stat/stata/library/ice.htm)). Any imputed data will be on an  
 447 individual item level, as opposed to an overall score level. Any imputation methods  
 448 used will be carefully considered and justified. Reasons for ineligibility, non-  
 449 compliance, withdrawal or other protocol violations will be stated and any patterns  
 450 summarized. More formal analysis, for example using logistic regression with 'protocol  
 451 violation' as a response, may also be appropriate and aid interpretation.

452

#### 453 **6.4 Interim analyses**

454 There are no pre-planned interim analysis in the FixDT trial. Interim analyses will be  
 455 performed only where directed by the DMC. Interim analyses will follow the same  
 456 procedure as the final analyses.

457

#### 458 **6.5 Final statistical datasets**

459

460 There will be two potential datasets used for the statistical analysis: (a) Observed and  
 461 (b) Imputed (Primary outcome only).

462

##### 463 **6.5.1 Feasibility Study**

464 At the end of the feasibility phase, the overall mean recruitment rates at the six  
 465 selected centres for this phase of the study will be estimated (with a 95% confidence  
 466 interval based on a normal approximation) and compared to the **target rate of 0.75**  
 467 **patients per month per centre**. The estimated recruitment rate in the feasibility phase  
 468 will inform both the design and the decision to proceed to the main RCT. Additionally  
 469 the nature and pattern of trial withdrawals and the likely impact of this on the main  
 470 RCT will also be carefully considered.

471

##### 472 **6.5.2 Main RCT**

473 The primary analyses will be performed on an 'intention to treat' (ITT) basis. This  
 474 involves analysing all patients within their randomised groups, regardless of whether  
 475 they completed their allocated treatment.

476

477 As a sensitivity analysis, the 'Per protocol' (PP) analyses will also be performed in  
478 addition, to place the results from the ITT analysis in context. The per-protocol  
479 analyses will remove the patients who have not complied with the protocol. If non-  
480 compliance becomes a problem then the planned analysis will be augmented with  
481 a Complier Average Causal Effect (CACE) analysis, but this should not be an issue in  
482 this trial.

483

#### 484 **6.5.2.1 Randomisation**

485 The numbers of patients randomised and screened has been detailed in Table 1. The  
486 randomisation of all eligible patients will be summarized in Tables 5 and 6, which will  
487 present:

- 488 - The number (%) of patients randomised to each treatment group at each centre
- 489 - The number (%) of patients randomised to each treatment summarized by  
490 randomisation strata at each centre

491

492

#### 493 **6.5.2.2 Baseline Data**

494 The baseline demographic and clinical characteristics of all randomised patients will  
495 be summarized by treatment group in Tables 7 – 9 (CHECK)

496

#### 497 **6.5.2.3 Harm Data (SAE's)**

498 The number (%) of SAE's will be summarized by treatment group in Tables 10 and 11.  
499 Individual number of SAE's and the number of SAE's per patient will be presented.

500

#### 501 **6.5.2.4 Non-adherence to protocol**

502 The DMC will monitor crossovers and non-adherence and offer advice on whether  
503 modifications to analysis should be made. There will be patients who are likely not to  
504 adhere to the protocol or depart from the intended treatment and/or evaluation.  
505 Any patients that depart from the intended treatment will be referred to as having  
506 "not adhered" to protocol for the purpose of the analyses. The following list is not by  
507 any means complete and during the trial further patients who do not adhere to the  
508 protocol will be identified. Currently non-adherence to the protocol consists of:

- 509 (i) Withdrawals;
- 510 (ii) Ineligible patients: Any patients who were ineligible but were subsequently  
511 randomised into the trial;

- 512 (iii) Patients who receive an alternative treatment: Any patients who do not  
513 receive their allocated treatment (either through their own choice or as a  
514 surgical decision);
- 515 (iv) Incomplete follow up: Any patients who have no follow up data at all.  
516

#### 517 **6.5.2.5 Primary Outcome**

518 The main analysis will investigate differences in the primary outcome measure, the  
519 DRI at 6 months after surgery, between the two treatment groups on an intention-to-  
520 treat basis. In addition, early functional status will also be assessed and reported at 3  
521 months and later functional status at 12 months. The differences between treatment  
522 groups will be assessed using a Student t-test, based on a Normal approximation for  
523 the DRI score at 6 months, and at other occasions. Tests will be two-sided and  
524 considered to provide evidence for a significant difference if p-values are less than  
525 0.05 (5% significance level). Estimates of treatment effects will be presented with 95%  
526 confidence intervals.

527

528 The minimization procedure used for randomization will ensure approximate balance  
529 in treatment allocation across recruiting centres and age groups (<50 and 50+  
530 years). We anticipate that any individual surgeon will operate on no more than 2-3  
531 patients, so we do not expect surgeon-specific effects to be important in this study.  
532 However, in addition to the unadjusted analyses (t-tests) we will also undertake  
533 regression analyses to adjust for any imbalance between treatment groups in patient  
534 baseline (pre-injury) DRI, age and gender. The fixed effects analysis (linear regression  
535 model) will also be generalized by adding a random effect for recruiting centre to  
536 allow for possible heterogeneity in patient outcomes due more generally to the  
537 recruiting centre.

538

539 The mixed-effects regression will be the definitive analyses and will be undertaken  
540 using the specialist mixed-effects modelling functions available in the software  
541 package R (<http://www.r-project.org/>). DRI data will be assumed to be  
542 approximately normally distributed; possibly after appropriate variance-stabilising  
543 transformation. The primary focus will be the comparison of the two treatment groups  
544 of patients, and this will be reflected in the analysis which will be reported together  
545 with appropriate diagnostic plots that check the underlying model assumptions.



546 Results will be presented as mean differences between the trial groups, with 95%  
547 confidence intervals.

548

#### 549 **6.5.2.5 Secondary Outcomes**

550 Secondary analyses will be undertaken using the above strategy for approximately  
551 normally distributed outcome measures OMAS and EQ-5D. For dichotomous  
552 outcome variables, such as indicators of deep infection and other complications  
553 related to the trial interventions, mixed effects logistic regression analysis will be  
554 undertaken with results presented as odds ratios (and 95% confidence intervals)  
555 between the trial groups. The temporal patterns of any complications will be  
556 presented graphically and if appropriate a time-to-event analysis (Kaplan-Meier  
557 survival analysis) will be used to assess the overall risk and risk within individual classes  
558 of complications (e.g. infection). Only a small number of patients are expected to  
559 die during follow-up, so this is unlikely to be a serious cause of bias. However, we will  
560 also if appropriate conduct a secondary analysis taking account of the competing  
561 risk of death, based on cumulative incidence functions. If multiple complications  
562 prove to be widely reported, then a secondary analysis will use a Poisson regression  
563 model to assess overall differences in counts of events between groups, adjusting for  
564 potential confounding factors such as age and gender. Multiple complications are  
565 defined as two or more independent events, i.e. not continuations of a previous  
566 complication, for the same patient and will be identified only after discussion with  
567 the clinical team.

568

569

#### 570 **6.6 Analysis plan**

571 The statistical analysis plan (SAP) will be agreed with the Data management  
572 Committee (DMC) at the start of the study. Any subsequent amendments to this  
573 initial SAP will be clearly stated and justified. Interim analyses will be performed only  
574 where directed by the DMC. The routine statistical analysis will mainly be carried out  
575 using Stata.

576

#### 577 **6.7 Reporting**

578 Wherever possible, the results of all analyses will be presented in a simple and easy to  
579 follow manner and relate any observed differences to their clinical importance, such  
580 that they could be clearly understood by those with only rudimentary statistical

581 knowledge. Open and confidential reports of the statistical analyses will be  
 582 produced, as required, by the trial statistician and where appropriate results will be  
 583 disseminated through peer-reviewed journals, conference presentations and through  
 584 local mechanisms.

585

586 **7. CONSORT DIAGRAM (proposed)**

587

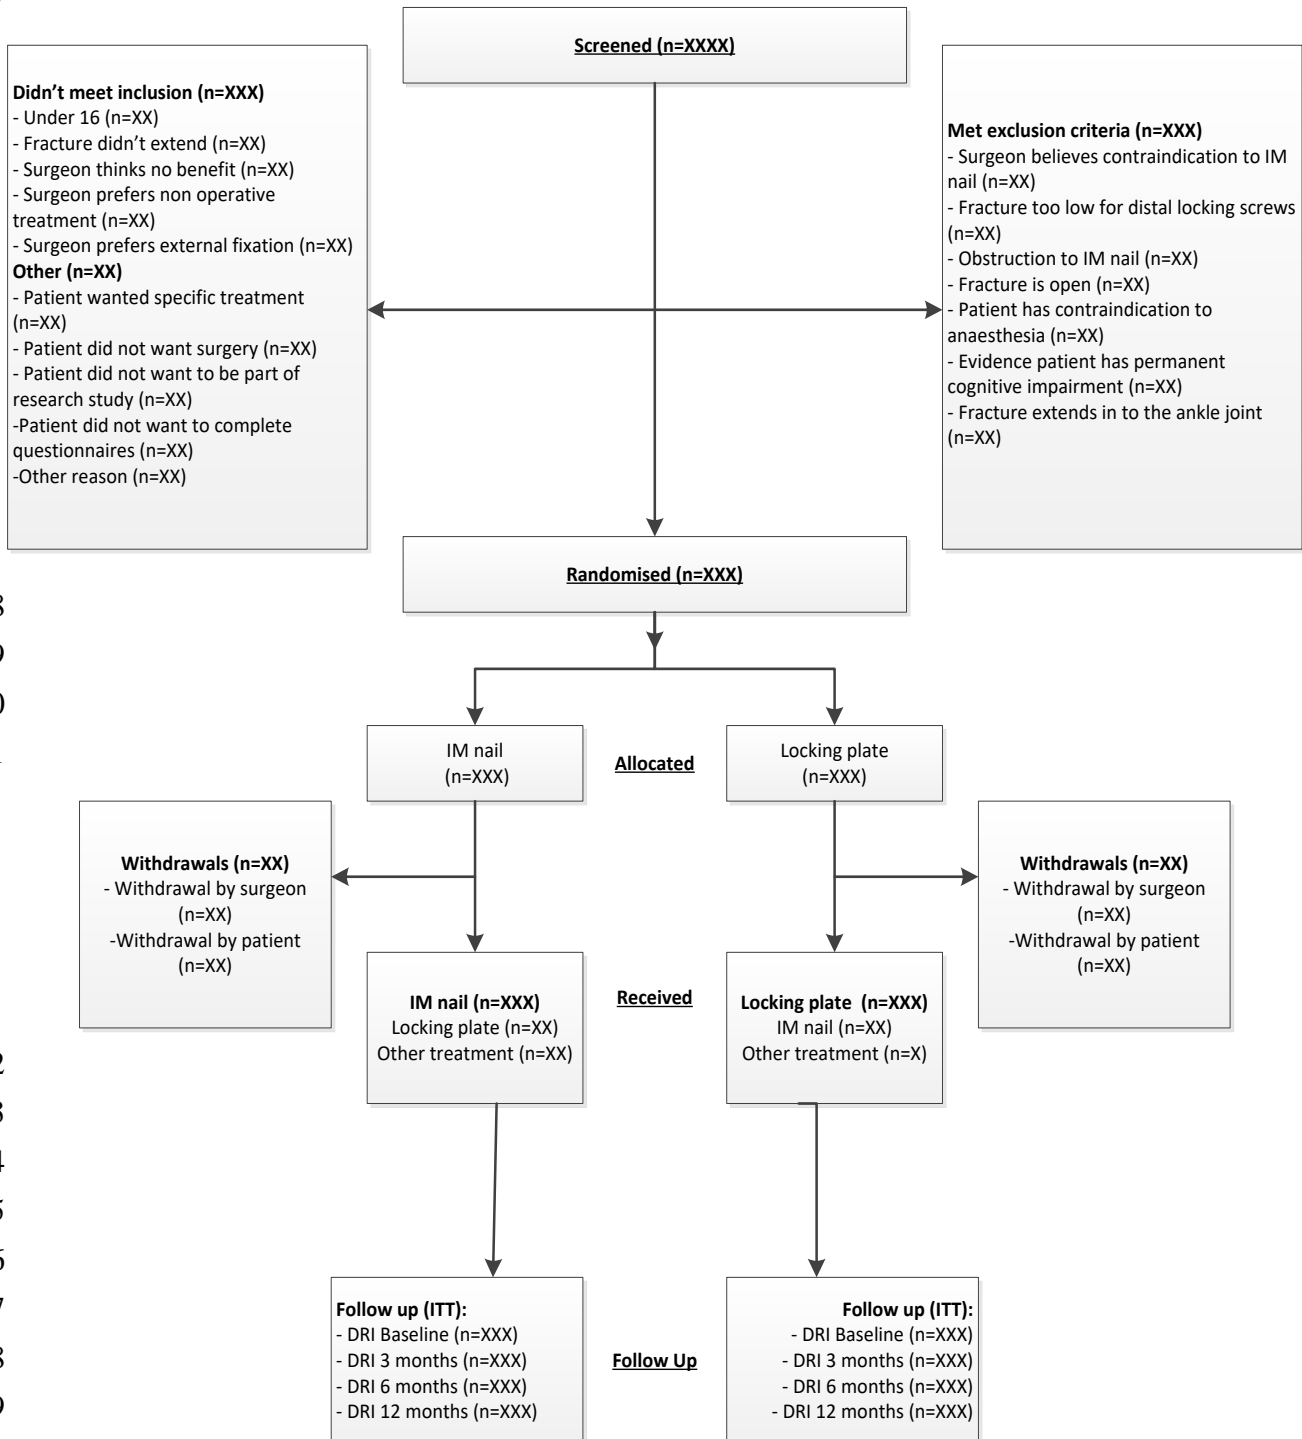

588

589

590

591

592

593

594

595

596

597

598

599

600

601

602  
603  
604  
605  
606  
607  
608  
609

**8. TEMPLATE TABLES**

**Table 1: Flow of patients in the FixDT trial**

|                                            |                                                                                                              |       |
|--------------------------------------------|--------------------------------------------------------------------------------------------------------------|-------|
| <b>FROM SCREENING TO PRE-RANDOMISATION</b> | All patients screened                                                                                        | n (%) |
|                                            | Excluded Patients: Patients not meeting inclusion criteria                                                   | n (%) |
|                                            | Excluded Patients: Patients meeting inclusion criteria but also meet at least one of the exclusion criteria. | n (%) |
| <b>PRE-RANDOMISATION</b>                   | Patients with baseline data                                                                                  | n (%) |
| <b>RANDOMISATION</b>                       | Patients satisfying the inclusion criteria and RANDOMISED                                                    | n (%) |
|                                            | Patients satisfying the inclusion criteria and NOT RANDOMISED                                                | n (%) |
|                                            | Patient randomised but ineligible                                                                            | n (%) |
| <b>FOLLOW-UP</b>                           | No follow-up data at any time point                                                                          | n (%) |
|                                            | Follow-up data at 3 months only                                                                              | n (%) |
|                                            | Follow-up data at 6 months only                                                                              | n (%) |
|                                            | Follow-up data at 3 and 6 months only                                                                        |       |
|                                            | Follow-up data at 12 months only                                                                             | n (%) |
|                                            | Follow-up data at 3 and 12 months only                                                                       |       |
|                                            | Follow-up data at 6 and 12 months only                                                                       |       |
|                                            | Follow-up data at all time points                                                                            | n (%) |
| <b>DIED</b>                                | After randomisation but before theatre for treatment                                                         | n (%) |
|                                            | In theatre but before starting any procedure                                                                 | n (%) |
|                                            | During initial treatment in hospital                                                                         | n (%) |
|                                            | After hospital discharge after initial treatment but before 3 month follow-up                                | n (%) |
|                                            | After 3 month follow-up but before 6 month follow-up                                                         | n (%) |
|                                            | After 6 month follow-up but before 6                                                                         | n (%) |

|                    |                                                           |       |
|--------------------|-----------------------------------------------------------|-------|
|                    | month follow-up                                           |       |
| <b>WITHDRAWALS</b> | After randomisation but before treatment                  | n (%) |
|                    | After treatment commencement but before 6 month follow-up | n (%) |
|                    | After 6 month follow-up but before 12 month follow-up     | n (%) |

610

611 **Table 2: Withdrawal details summarised by treatment group**

|                                                                         |                                                                                                                            | <b>IM Nail</b> | <b>Locking plate</b> | <b>TOTAL</b> | <b>P-value</b> |
|-------------------------------------------------------------------------|----------------------------------------------------------------------------------------------------------------------------|----------------|----------------------|--------------|----------------|
| <b>Patient requested to withdraw from trial</b>                         | Yes                                                                                                                        | n (%)          | n (%)                | N            | xx.xx          |
|                                                                         | No                                                                                                                         | n (%)          | n (%)                | N            |                |
|                                                                         | Missing                                                                                                                    | n (%)          | n (%)                | N            |                |
| <b>Surgeon caring for patient requested for patient to be withdrawn</b> | Yes                                                                                                                        | n (%)          | n (%)                | N            | xx.xx          |
|                                                                         | No                                                                                                                         | n (%)          | n (%)                | N            |                |
|                                                                         | Missing                                                                                                                    | n (%)          | n (%)                | N            |                |
| <b>Patient level of withdrawal</b>                                      | Not stated                                                                                                                 | n (%)          | n (%)                | N            | xx.xx          |
|                                                                         | Withdrawn from completing further questionnaires, but allowed trial team access to future hospital data (including x-rays) | n (%)          | n (%)                | N            |                |
|                                                                         | Withdrawn wholly from the study, and only data obtained up to withdrawal date included in any analysis.                    | n (%)          | n (%)                | N            |                |

612

613

614 **Listing 1: If patient expressed wish to withdraw and reason known, please specify reason below**

616 Listing of reasons will be by treatment group. The following will be listed: Patient number, centre, timing of withdrawal and reason for withdrawal.

618

619 **Listing 2: If surgeon caring for patient requested for the patient to be withdrawn, please specify reason below**

621 Listing of reasons will be by treatment group. The following will be listed: Patient number, centre, surgeon name, timing of withdrawal and reason for withdrawal.

623

624  
625  
626  
627  
628  
629  
630  
631  
632

**Table 3: Patients who did not receive allocated treatment summarised by treatment group**

|                                                                                        |               | PHT   | HA    | TOTAL | P-value |
|----------------------------------------------------------------------------------------|---------------|-------|-------|-------|---------|
| <b>If patient did not receive allocated treatment, what treatment did they receive</b> | IM nail       | n (%) | n (%) | N     | xx.xx   |
|                                                                                        | Locking plate | n (%) | n (%) | N     |         |
|                                                                                        | Other         | n (%) | n (%) | N     |         |
|                                                                                        | Missing       | n (%) | n (%) | N     |         |
| <b>Reason why IM nail not used if patient allocated to IM nail</b>                     | ???           | n (%) | n (%) | N     | xx.xx   |
|                                                                                        | ???           | n (%) | n (%) | N     |         |
|                                                                                        | ???           | n (%) | n (%) | N     |         |
|                                                                                        | Other         | n (%) | n (%) | N     |         |
|                                                                                        | Missing       | n (%) | n (%) | N     |         |
| <b>Reason why locking plate not used if patient allocated to locking plate</b>         | ???           | n (%) | n (%) | N     | xx.xx   |
|                                                                                        | ???           | n (%) | n (%) | N     |         |
|                                                                                        | ???           | n (%) | n (%) | N     |         |
|                                                                                        | Other         | n (%) | n (%) | N     |         |
|                                                                                        | Missing       | n (%) | n (%) | N     |         |

633  
634  
635  
636  
637  
638  
639

**Listing 3: If patient did not receive allocated treatment and received 'Other' treatment, please specify**

Listing of 'other' treatment received will be by allocated treatment group. The following will be listed: Patient number, centre and specification of 'other' treatment given.

**Table 4: Follow-up rates in the FixDT Trial**

|                               | 3 Months | 6 Months | 12 Months |
|-------------------------------|----------|----------|-----------|
| Completed questionnaire       | n (%)    | n (%)    | n (%)     |
| Awaiting questionnaire        | n (%)    | n (%)    | n (%)     |
| No reply (after full chasing) | n (%)    | n (%)    | n (%)     |

|                         |       |       |       |
|-------------------------|-------|-------|-------|
| No contact/being chased | n (%) | n (%) | n (%) |
| Consent withdrawn       | n (%) | n (%) | n (%) |
| Dead                    | n (%) | n (%) | n (%) |

640  
641  
642  
643  
644

**Table 5: Randomised patients summarised by treatment group and centre**

|                                           | <b>IM Nail</b> | <b>Locking plate</b> | <b>TOTAL</b> |
|-------------------------------------------|----------------|----------------------|--------------|
| <b>UHCW, Coventry</b>                     | n (%)          | n (%)                | N            |
| <b>Frenchay Hospital, Bristol</b>         | n (%)          | n (%)                | N            |
| <b>University Hospital Leicester</b>      | n (%)          | n (%)                | N            |
| <b>James Cook Hospital, Middlesbrough</b> | n (%)          | n (%)                | N            |
| ⋮                                         | ⋮              | ⋮                    | ⋮            |

645  
646  
647  
648

**Table 6: Randomised patients summarised by randomisation strata (recruiting site, age and FAI type)**

| <b>Age:</b>                          | <b>Age &lt;50</b> |                      | <b>Age &gt;= 50</b> |                      |
|--------------------------------------|-------------------|----------------------|---------------------|----------------------|
|                                      | <b>IM Nail</b>    | <b>Locking plate</b> | <b>IM Nail</b>      | <b>Locking plate</b> |
| <b>UHCW, Coventry</b>                | n (%)             | n (%)                | n (%)               | n (%)                |
| <b>Frenchay Hospital, Bristol</b>    | n (%)             | n (%)                | n (%)               | n (%)                |
| <b>University Hospital Leicester</b> | n (%)             | n (%)                | n (%)               | n (%)                |
| <b>James Cook, Middlesbrough</b>     | n (%)             | n (%)                | n (%)               | n (%)                |
| ⋮                                    | ⋮                 | ⋮                    | ⋮                   | ⋮                    |

649  
650  
651  
652  
653  
654  
655  
656  
657  
658  
659  
660

661  
662  
663  
664  
665  
666  
667  
668  
669  
670

**Table 7: Baseline demographic and clinical characteristics of all randomised patients summarised by treatment group**

|                            |                       | <b>IM Nail</b> | <b>Locking Plate</b> | <b>TOTAL</b> |
|----------------------------|-----------------------|----------------|----------------------|--------------|
| <b>Age (years)</b>         | Mean                  | xx.xx          | xx.xx                | xx.xx        |
|                            | N                     | xx.xx          | xx.xx                | xx.xx        |
|                            | Std. Deviation        | xx.xx          | xx.xx                | xx.xx        |
|                            | Median                | xx.xx          | xx.xx                | xx.xx        |
|                            | Minimum               | xx.xx          | xx.xx                | xx.xx        |
|                            | Maximum               | xx.xx          | xx.xx                | xx.xx        |
|                            | Missing               | xx.xx          | xx.xx                | xx.xx        |
| <b>Side of fracture</b>    | Left                  | n (%)          | n (%)                | N            |
|                            | Right                 | n (%)          | n (%)                | N            |
|                            | Missing               | n (%)          | n (%)                | N            |
| <b>Mechanism of injury</b> | Low energy fall       | n (%)          | n (%)                | N            |
|                            | High energy fall      | n (%)          | n (%)                | N            |
|                            | Road traffic accident | n (%)          | n (%)                | N            |
|                            | Crush injury          | n (%)          | n (%)                | N            |
|                            | Contact sports injury | n (%)          | n (%)                | N            |
|                            | Other                 | n (%)          | n (%)                | N            |
|                            | Missing               | n (%)          | n (%)                | N            |
| <b>Height (cm)</b>         | Mean                  | xx.xx          | xx.xx                | xx.xx        |
|                            | N                     | xx.xx          | xx.xx                | xx.xx        |
|                            | Std. Deviation        | xx.xx          | xx.xx                | xx.xx        |
|                            | Median                | xx.xx          | xx.xx                | xx.xx        |
|                            | Minimum               | xx.xx          | xx.xx                | xx.xx        |
|                            | Maximum               | xx.xx          | xx.xx                | xx.xx        |
|                            | Missing               | xx.xx          | xx.xx                | xx.xx        |
| <b>Weight (kg)</b>         | Mean                  | xx.xx          | xx.xx                | xx.xx        |
|                            | N                     | xx.xx          | xx.xx                | xx.xx        |

|                                                                   |                |       |       |       |
|-------------------------------------------------------------------|----------------|-------|-------|-------|
|                                                                   | Std. Deviation | xx.xx | xx.xx | xx.xx |
|                                                                   | Median         | xx.xx | xx.xx | xx.xx |
|                                                                   | Minimum        | xx.xx | xx.xx | xx.xx |
|                                                                   | Maximum        | xx.xx | xx.xx | xx.xx |
|                                                                   | Missing        | xx.xx | xx.xx | xx.xx |
| <b>Current smoking status</b>                                     | Yes            | n (%) | n (%) | N     |
|                                                                   | No             | n (%) | n (%) | N     |
|                                                                   | Missing        | n (%) | n (%) | N     |
| <b>If yes, for how many years smoking</b>                         | Mean           | xx.xx | xx.xx | xx.xx |
|                                                                   | N              | xx.xx | xx.xx | xx.xx |
|                                                                   | Std. Deviation | xx.xx | xx.xx | xx.xx |
|                                                                   | Median         | xx.xx | xx.xx | xx.xx |
|                                                                   | Minimum        | xx.xx | xx.xx | xx.xx |
|                                                                   | Maximum        | xx.xx | xx.xx | xx.xx |
|                                                                   | Missing        | xx.xx | xx.xx | xx.xx |
| <b>If yes, how many smoked on average per day</b>                 | Mean           | xx.xx | xx.xx | xx.xx |
|                                                                   | N              | xx.xx | xx.xx | xx.xx |
|                                                                   | Std. Deviation | xx.xx | xx.xx | xx.xx |
|                                                                   | Median         | xx.xx | xx.xx | xx.xx |
|                                                                   | Minimum        | xx.xx | xx.xx | xx.xx |
|                                                                   | Maximum        | xx.xx | xx.xx | xx.xx |
|                                                                   | Missing        | xx.xx | xx.xx | xx.xx |
| <b>Units of alcohol in an average week</b>                        | Mean           | xx.xx | xx.xx | xx.xx |
|                                                                   | N              | xx.xx | xx.xx | xx.xx |
|                                                                   | Std. Deviation | xx.xx | xx.xx | xx.xx |
|                                                                   | Median         | xx.xx | xx.xx | xx.xx |
|                                                                   | Minimum        | xx.xx | xx.xx | xx.xx |
|                                                                   | Maximum        | xx.xx | xx.xx | xx.xx |
|                                                                   | Missing        | xx.xx | xx.xx | xx.xx |
| <b>Diabetes status</b>                                            | Yes            | n (%) | n (%) | N     |
|                                                                   | No             | n (%) | n (%) | N     |
|                                                                   | Missing        | n (%) | n (%) | N     |
| <b>Previous problems with the lower limb on the injured side?</b> | Yes            | n (%) | n (%) | N     |
|                                                                   | No             | n (%) | n (%) | N     |
|                                                                   | Missing        | n (%) | n (%) | N     |
| <b>Disability Rating</b>                                          | Mean           | xx.xx | xx.xx | xx.xx |



|                                              |                |       |       |       |
|----------------------------------------------|----------------|-------|-------|-------|
| <b>Index (Baseline)</b>                      | N              | xx.xx | xx.xx | xx.xx |
|                                              | Std. Deviation | xx.xx | xx.xx | xx.xx |
|                                              | Median         | xx.xx | xx.xx | xx.xx |
|                                              | Minimum        | xx.xx | xx.xx | xx.xx |
|                                              | Maximum        | xx.xx | xx.xx | xx.xx |
|                                              | Missing        | xx.xx | xx.xx | xx.xx |
| <b>EQ-5D Mobility (Pre-injury)</b>           | Level 1        | n (%) | n (%) | n (%) |
|                                              | Level 2        | n (%) | n (%) | n (%) |
|                                              | Level 3        | n (%) | n (%) | n (%) |
|                                              | Missing        | n (%) | n (%) | n (%) |
| <b>EQ-5D Self-care (Pre-injury)</b>          | Level 1        | n (%) | n (%) | n (%) |
|                                              | Level 2        | n (%) | n (%) | n (%) |
|                                              | Level 3        | n (%) | n (%) | n (%) |
|                                              | Missing        | n (%) | n (%) | n (%) |
| <b>EQ-5D Usual activities (Pre-injury)</b>   | Level 1        | n (%) | n (%) | n (%) |
|                                              | Level 2        | n (%) | n (%) | n (%) |
|                                              | Level 3        | n (%) | n (%) | n (%) |
|                                              | Missing        | n (%) | n (%) | n (%) |
| <b>EQ-5D Pain/discomfort (Pre-injury)</b>    | Level 1        | n (%) | n (%) | n (%) |
|                                              | Level 2        | n (%) | n (%) | n (%) |
|                                              | Level 3        | n (%) | n (%) | n (%) |
|                                              | Missing        | n (%) | n (%) | n (%) |
| <b>EQ-5D Anxiety/depression (Pre-injury)</b> | Level 1        | n (%) | n (%) | n (%) |
|                                              | Level 2        | n (%) | n (%) | n (%) |
|                                              | Level 3        | n (%) | n (%) | n (%) |
|                                              | Missing        | n (%) | n (%) | n (%) |
| <b>EQ-5D Score (Pre-injury)</b>              | Mean           | xx.xx | xx.xx | xx.xx |
|                                              | N              | xx.xx | xx.xx | xx.xx |
|                                              | Std. Deviation | xx.xx | xx.xx | xx.xx |
|                                              | Median         | xx.xx | xx.xx | xx.xx |
|                                              | Minimum        | xx.xx | xx.xx | xx.xx |
|                                              | Maximum        | xx.xx | xx.xx | xx.xx |
|                                              | Missing        | xx.xx | xx.xx | xx.xx |
| <b>EQ-5D VAS (Pre-injury)</b>                | Mean           | xx.xx | xx.xx | xx.xx |
|                                              | N              | xx.xx | xx.xx | xx.xx |
|                                              | Std. Deviation | xx.xx | xx.xx | xx.xx |

|                                                       |                |       |       |       |
|-------------------------------------------------------|----------------|-------|-------|-------|
|                                                       | Median         | xx.xx | xx.xx | xx.xx |
|                                                       | Minimum        | xx.xx | xx.xx | xx.xx |
|                                                       | Maximum        | xx.xx | xx.xx | xx.xx |
|                                                       | Missing        | xx.xx | xx.xx | xx.xx |
| <b>EQ-5D Mobility<br/>(Post-injury)</b>               | Level 1        | n (%) | n (%) | n (%) |
|                                                       | Level 2        | n (%) | n (%) | n (%) |
|                                                       | Level 3        | n (%) | n (%) | n (%) |
|                                                       | Missing        | n (%) | n (%) | n (%) |
| <b>EQ-5D Self-care<br/>(Post-injury)</b>              | Level 1        | n (%) | n (%) | n (%) |
|                                                       | Level 2        | n (%) | n (%) | n (%) |
|                                                       | Level 3        | n (%) | n (%) | n (%) |
|                                                       | Missing        | n (%) | n (%) | n (%) |
| <b>EQ-5D Usual<br/>activities (Post-<br/>injury)</b>  | Level 1        | n (%) | n (%) | n (%) |
|                                                       | Level 2        | n (%) | n (%) | n (%) |
|                                                       | Level 3        | n (%) | n (%) | n (%) |
|                                                       | Missing        | n (%) | n (%) | n (%) |
| <b>EQ-5D<br/>Pain/discomfort<br/>(Post-injury)</b>    | Level 1        | n (%) | n (%) | n (%) |
|                                                       | Level 2        | n (%) | n (%) | n (%) |
|                                                       | Level 3        | n (%) | n (%) | n (%) |
|                                                       | Missing        | n (%) | n (%) | n (%) |
| <b>EQ-5D<br/>Anxiety/depression<br/>(Post-injury)</b> | Level 1        | n (%) | n (%) | n (%) |
|                                                       | Level 2        | n (%) | n (%) | n (%) |
|                                                       | Level 3        | n (%) | n (%) | n (%) |
|                                                       | Missing        | n (%) | n (%) | n (%) |
| <b>EQ-5D Score (Post-<br/>injury)</b>                 | Mean           | xx.xx | xx.xx | xx.xx |
|                                                       | N              | xx.xx | xx.xx | xx.xx |
|                                                       | Std. Deviation | xx.xx | xx.xx | xx.xx |
|                                                       | Median         | xx.xx | xx.xx | xx.xx |
|                                                       | Minimum        | xx.xx | xx.xx | xx.xx |
|                                                       | Maximum        | xx.xx | xx.xx | xx.xx |
|                                                       | Missing        | xx.xx | xx.xx | xx.xx |
| <b>EQ-5D VAS (Post-<br/>injury)</b>                   | Mean           | xx.xx | xx.xx | xx.xx |
|                                                       | N              | xx.xx | xx.xx | xx.xx |
|                                                       | Std. Deviation | xx.xx | xx.xx | xx.xx |
|                                                       | Median         | xx.xx | xx.xx | xx.xx |
|                                                       | Minimum        | xx.xx | xx.xx | xx.xx |
|                                                       | Maximum        | xx.xx | xx.xx | xx.xx |
|                                                       | Missing        | xx.xx | xx.xx | xx.xx |

|  |         |       |       |       |
|--|---------|-------|-------|-------|
|  | Missing | xx.xx | xx.xx | xx.xx |
|--|---------|-------|-------|-------|

671  
672  
673  
674  
675  
676  
677  
678  
679

**Table 9: Operation notes summarised by treatment group**

|                                                    |         | IM Nail | Locking Plate | TOTAL |
|----------------------------------------------------|---------|---------|---------------|-------|
| <b>Any intra-operative problems?</b>               | Yes     | n (%)   | n (%)         | N     |
|                                                    | No      | n (%)   | n (%)         | N     |
|                                                    | Missing | n (%)   | n (%)         | N     |
| <b>If yes, any nerve injury?</b>                   | Yes     | n (%)   | n (%)         | N     |
|                                                    | No      | n (%)   | n (%)         | N     |
| <b>If yes, any vascular injury?</b>                | Yes     | n (%)   | n (%)         | N     |
|                                                    | No      | n (%)   | n (%)         | N     |
| <b>If yes, any tendon injury?</b>                  | Yes     | n (%)   | n (%)         | N     |
|                                                    | No      | n (%)   | n (%)         | N     |
| <b>If yes, any extension of fracture?</b>          | Yes     | n (%)   | n (%)         | N     |
|                                                    | No      | n (%)   | n (%)         | N     |
| <b>Which fixation method was performed?</b>        | IM nail | n (%)   | n (%)         | N     |
|                                                    | Plate   | n (%)   | n (%)         | N     |
|                                                    | Other   | n (%)   | n (%)         | N     |
|                                                    | Missing | n (%)   | n (%)         | N     |
| <b>Was this different to randomisation?</b>        | Yes     | n (%)   | n (%)         | N     |
|                                                    | No      | n (%)   | n (%)         | N     |
|                                                    | Missing | n (%)   | n (%)         | N     |
| <b><u>If IM nail used:</u></b>                     |         | n (%)   |               |       |
| <b>How many bolts were used in coronal plane?</b>  | 0       | n (%)   |               |       |
|                                                    | 1       | n (%)   |               |       |
|                                                    | 2       | n (%)   |               |       |
|                                                    | Missing | n (%)   |               |       |
| <b>How many bolts were used in sagittal plane?</b> | 0       | n (%)   |               |       |
|                                                    | 1       | n (%)   |               |       |

|                                                          |                       |       |       |  |
|----------------------------------------------------------|-----------------------|-------|-------|--|
|                                                          | 2                     | n (%) |       |  |
|                                                          | Missing               | n (%) |       |  |
| <b>How many bolts were used in oblique plane?</b>        | 0                     | n (%) |       |  |
|                                                          | 1                     | n (%) |       |  |
|                                                          | 2                     | n (%) |       |  |
|                                                          | Missing               | n (%) |       |  |
| <b>How many blocking screws were used?</b>               | 0                     | n (%) |       |  |
|                                                          | 1                     | n (%) |       |  |
|                                                          | 2                     | n (%) |       |  |
|                                                          | 3                     | n (%) |       |  |
|                                                          | 4                     | n (%) |       |  |
|                                                          | Missing               | n (%) |       |  |
| <b>What reduction technique was used for the nail?</b>   | Open                  | n (%) |       |  |
|                                                          | Closed                | n (%) |       |  |
|                                                          | Skeletal traction     | n (%) |       |  |
|                                                          | No traction           | n (%) |       |  |
|                                                          | Missing               | n (%) |       |  |
| <b>What surgical approach was used?</b>                  | Medial parapatella    | n (%) |       |  |
|                                                          | Lateral parapatella   | n (%) |       |  |
|                                                          | Tendon splitting      | n (%) |       |  |
|                                                          | Suprapatella approach | n (%) |       |  |
|                                                          | Missing               | n (%) |       |  |
| <b><u>If locking plate was used:</u></b>                 |                       |       |       |  |
| <b>How many screws were used distal to the fracture?</b> | 1                     |       | n (%) |  |
|                                                          | 2                     |       | n (%) |  |
|                                                          | 3                     |       | n (%) |  |
|                                                          | 4                     |       | n (%) |  |
|                                                          | 5                     |       | n (%) |  |
|                                                          | 6                     |       | n (%) |  |
|                                                          | 6+                    |       | n (%) |  |
|                                                          | Missing               |       | n (%) |  |
| <b>How many screws were</b>                              | 0                     |       | n (%) |  |

|                                       |         |  |       |  |
|---------------------------------------|---------|--|-------|--|
| <b>used proximal to the fracture?</b> | 1       |  | n (%) |  |
|                                       | 2       |  | n (%) |  |
|                                       | 3       |  | n (%) |  |
|                                       | 4       |  | n (%) |  |
|                                       | 5       |  | n (%) |  |
|                                       | 5+      |  | n (%) |  |
|                                       | Missing |  | n (%) |  |
| More to add here...                   |         |  |       |  |

680

681 **Table 10: Serious Adverse Events (SAE's) summarised by treatment group**

| Reason                                                       | IM Nail | Locking Plate | TOTAL |
|--------------------------------------------------------------|---------|---------------|-------|
| Death within 30 days of trial treatment                      | n (%)   | n (%)         | N     |
| Death related to the trial surgical intervention at any time | n (%)   | n (%)         | N     |
| A life or limb threatening complication                      | n (%)   | n (%)         | N     |
| Prolongation of existing hospitalisation                     | n (%)   | n (%)         | N     |
| Re-hospitalisation for any leg treatment (trial leg)         | n (%)   | n (%)         | N     |
| Other medically significant reason for reporting             | n (%)   | n (%)         | N     |
| Missing                                                      | n (%)   | n (%)         | N     |

682

683 Could expand these further?

684

685 **Table 11: Principal Investigator's assessment of SAE's summarised by treatment group**

|                                        | IM Nail | Locking Plate | TOTAL |
|----------------------------------------|---------|---------------|-------|
| Expected                               | n (%)   | n (%)         | N     |
| Unexpected                             | n (%)   | n (%)         | N     |
| SAE caused by taking part in FixDT     | n (%)   | n (%)         | N     |
| SAE not caused by taking part in FixDT | n (%)   | n (%)         | N     |
| Missing                                | n (%)   | n (%)         | N     |

686

687 **Listing 4: If SAE caused by taking part in the FixDT trial, please specify**

688 Listing will be by treatment group. The following will be listed: patient number, person making  
689 judgement and date

690

691 **Table 12: Primary outcome at 6 months summarised as a continuous outcome by treatment group**

|                                      |      | IM Nail | Locking Plate | TOTAL |
|--------------------------------------|------|---------|---------------|-------|
| <b>Disability Rating Index (DRI)</b> | Mean | xx.xx   | xx.xx         | xx.xx |

|  |                |       |       |       |
|--|----------------|-------|-------|-------|
|  | N              | xx.xx | xx.xx | xx.xx |
|  | Std. Deviation | xx.xx | xx.xx | xx.xx |
|  | Median         | xx.xx | xx.xx | xx.xx |
|  | Minimum        | xx.xx | xx.xx | xx.xx |
|  | Maximum        | xx.xx | xx.xx | xx.xx |
|  | Missing        | xx.xx | xx.xx | xx.xx |

692

693 **Figure 2: Observed treatment difference plot with 95% confidence interval**

694

695 **Table 13: Secondary outcomes at follow-up (3, 6, and 12 months) summarised by treatment group**

|                                           |                  |                | IM Nail | Locking Plate | TOTAL | P-value |
|-------------------------------------------|------------------|----------------|---------|---------------|-------|---------|
| <b>Disability Rating Index (DRI)</b>      | <b>3 months</b>  | Mean           | xx.xx   | xx.xx         | xx.xx | xx.xx   |
|                                           |                  | N              | xx.xx   | xx.xx         | xx.xx |         |
|                                           |                  | Std. Deviation | xx.xx   | xx.xx         | xx.xx |         |
|                                           |                  | Median         | xx.xx   | xx.xx         | xx.xx |         |
|                                           |                  | Minimum        | xx.xx   | xx.xx         | xx.xx |         |
|                                           |                  | Maximum        | xx.xx   | xx.xx         | xx.xx |         |
|                                           |                  | Missing        | xx.xx   | xx.xx         | xx.xx |         |
|                                           | <b>12 months</b> | Mean           | xx.xx   | xx.xx         | xx.xx | xx.xx   |
|                                           |                  | N              | xx.xx   | xx.xx         | xx.xx |         |
|                                           |                  | Std. Deviation | xx.xx   | xx.xx         | xx.xx |         |
|                                           |                  | Median         | xx.xx   | xx.xx         | xx.xx |         |
|                                           |                  | Minimum        | xx.xx   | xx.xx         | xx.xx |         |
|                                           |                  | Maximum        | xx.xx   | xx.xx         | xx.xx |         |
|                                           |                  | Missing        | xx.xx   | xx.xx         | xx.xx |         |
| <b>Olerud-Molander Ankle Score (OMAS)</b> | <b>3 months</b>  | Mean           | xx.xx   | xx.xx         | xx.xx | xx.xx   |
|                                           |                  | N              | xx.xx   | xx.xx         | xx.xx |         |
|                                           |                  | Std. Deviation | xx.xx   | xx.xx         | xx.xx |         |
|                                           |                  | Median         | xx.xx   | xx.xx         | xx.xx |         |
|                                           |                  | Minimum        | xx.xx   | xx.xx         | xx.xx |         |
|                                           |                  | Maximum        | xx.xx   | xx.xx         | xx.xx |         |
|                                           |                  | Missing        | xx.xx   | xx.xx         | xx.xx |         |
|                                           | <b>6 months</b>  | Mean           | xx.xx   | xx.xx         | xx.xx | xx.xx   |
|                                           |                  | N              | xx.xx   | xx.xx         | xx.xx |         |
|                                           |                  | Std. Deviation | xx.xx   | xx.xx         | xx.xx |         |
|                                           |                  | Median         | xx.xx   | xx.xx         | xx.xx |         |

|                                 |                  |                |       |       |       |       |
|---------------------------------|------------------|----------------|-------|-------|-------|-------|
|                                 |                  | Minimum        | xx.xx | xx.xx | xx.xx |       |
|                                 |                  | Maximum        | xx.xx | xx.xx | xx.xx |       |
|                                 |                  | Missing        | xx.xx | xx.xx | xx.xx |       |
|                                 | <b>12 months</b> | Mean           | xx.xx | xx.xx | xx.xx | xx.xx |
|                                 |                  | N              | xx.xx | xx.xx | xx.xx |       |
|                                 |                  | Std. Deviation | xx.xx | xx.xx | xx.xx |       |
|                                 |                  | Median         | xx.xx | xx.xx | xx.xx |       |
|                                 |                  | Minimum        | xx.xx | xx.xx | xx.xx |       |
|                                 |                  | Maximum        | xx.xx | xx.xx | xx.xx |       |
|                                 |                  | Missing        | xx.xx | xx.xx | xx.xx |       |
| <b>EQ-5D (Mobility)</b>         | <b>3 months</b>  | Level 1        | n (%) | n (%) | n (%) | xx.xx |
|                                 |                  | Level 2        | n (%) | n (%) | n (%) |       |
|                                 |                  | Level 3        | n (%) | n (%) | n (%) |       |
|                                 |                  | Missing        | n (%) | n (%) | n (%) |       |
|                                 | <b>6 months</b>  | Level 1        | n (%) | n (%) | n (%) | xx.xx |
|                                 |                  | Level 2        | n (%) | n (%) | n (%) |       |
|                                 |                  | Level 3        | n (%) | n (%) | n (%) |       |
|                                 |                  | Missing        | n (%) | n (%) | n (%) |       |
|                                 | <b>12 months</b> | Level 1        | n (%) | n (%) | n (%) | xx.xx |
|                                 |                  | Level 2        | n (%) | n (%) | n (%) |       |
|                                 |                  | Level 3        | n (%) | n (%) | n (%) |       |
|                                 |                  | Missing        | n (%) | n (%) | n (%) |       |
| <b>EQ-5D (Self care)</b>        | <b>3 months</b>  | Level 1        | n (%) | n (%) | n (%) | xx.xx |
|                                 |                  | Level 2        | n (%) | n (%) | n (%) |       |
|                                 |                  | Level 3        | n (%) | n (%) | n (%) |       |
|                                 |                  | Missing        | n (%) | n (%) | n (%) |       |
|                                 | <b>6 months</b>  | Level 1        | n (%) | n (%) | n (%) | xx.xx |
|                                 |                  | Level 2        | n (%) | n (%) | n (%) |       |
|                                 |                  | Level 3        | n (%) | n (%) | n (%) |       |
|                                 |                  | Missing        | n (%) | n (%) | n (%) |       |
|                                 | <b>12 months</b> | Level 1        | n (%) | n (%) | n (%) | xx.xx |
|                                 |                  | Level 2        | n (%) | n (%) | n (%) |       |
|                                 |                  | Level 3        | n (%) | n (%) | n (%) |       |
|                                 |                  | Missing        | n (%) | n (%) | n (%) |       |
| <b>EQ-5D (Usual activities)</b> | <b>3 months</b>  | Level 1        | n (%) | n (%) | n (%) | xx.xx |
|                                 |                  | Level 2        | n (%) | n (%) | n (%) |       |
|                                 |                  | Level 3        | n (%) | n (%) | n (%) |       |

|                                       |                  |                |       |       |       |       |
|---------------------------------------|------------------|----------------|-------|-------|-------|-------|
|                                       |                  | Missing        | n (%) | n (%) | n (%) |       |
|                                       | <b>6 months</b>  | Level 1        | n (%) | n (%) | n (%) | xx.xx |
|                                       |                  | Level 2        | n (%) | n (%) | n (%) |       |
|                                       |                  | Level 3        | n (%) | n (%) | n (%) |       |
|                                       |                  | Missing        | n (%) | n (%) | n (%) |       |
|                                       | <b>12 months</b> | Level 1        | n (%) | n (%) | n (%) | xx.xx |
|                                       |                  | Level 2        | n (%) | n (%) | n (%) |       |
|                                       |                  | Level 3        | n (%) | n (%) | n (%) |       |
|                                       |                  | Missing        | n (%) | n (%) | n (%) |       |
| <b>EQ-5D<br/>(Pain/discomfort)</b>    | <b>3 months</b>  | Level 1        | n (%) | n (%) | n (%) | xx.xx |
|                                       |                  | Level 2        | n (%) | n (%) | n (%) |       |
|                                       |                  | Level 3        | n (%) | n (%) | n (%) |       |
|                                       |                  | Missing        | n (%) | n (%) | n (%) |       |
|                                       | <b>6 months</b>  | Level 1        | n (%) | n (%) | n (%) | xx.xx |
|                                       |                  | Level 2        | n (%) | n (%) | n (%) |       |
|                                       |                  | Level 3        | n (%) | n (%) | n (%) |       |
|                                       |                  | Missing        | n (%) | n (%) | n (%) |       |
|                                       | <b>12 months</b> | Level 1        | n (%) | n (%) | n (%) | xx.xx |
|                                       |                  | Level 2        | n (%) | n (%) | n (%) |       |
|                                       |                  | Level 3        | n (%) | n (%) | n (%) |       |
|                                       |                  | Missing        | n (%) | n (%) | n (%) |       |
| <b>EQ-5D<br/>(Anxiety/depression)</b> | <b>3 months</b>  | Level 1        | n (%) | n (%) | n (%) | xx.xx |
|                                       |                  | Level 2        | n (%) | n (%) | n (%) |       |
|                                       |                  | Level 3        | n (%) | n (%) | n (%) |       |
|                                       |                  | Missing        | n (%) | n (%) | n (%) |       |
|                                       | <b>6 months</b>  | Level 1        | n (%) | n (%) | n (%) | xx.xx |
|                                       |                  | Level 2        | n (%) | n (%) | n (%) |       |
|                                       |                  | Level 3        | n (%) | n (%) | n (%) |       |
|                                       |                  | Missing        | n (%) | n (%) | n (%) |       |
|                                       | <b>12 months</b> | Level 1        | n (%) | n (%) | n (%) | xx.xx |
|                                       |                  | Level 2        | n (%) | n (%) | n (%) |       |
|                                       |                  | Level 3        | n (%) | n (%) | n (%) |       |
|                                       |                  | Missing        | n (%) | n (%) | n (%) |       |
| <b>EQ-5D Score</b>                    | <b>3 months</b>  | Mean           | xx.xx | xx.xx | xx.xx | xx.xx |
|                                       |                  | N              | xx.xx | xx.xx | xx.xx |       |
|                                       |                  | Std. Deviation | xx.xx | xx.xx | xx.xx |       |
|                                       |                  | Median         | xx.xx | xx.xx | xx.xx |       |



|                  |                  |                |       |       |       |       |
|------------------|------------------|----------------|-------|-------|-------|-------|
|                  |                  | Minimum        | xx.xx | xx.xx | xx.xx |       |
|                  |                  | Maximum        | xx.xx | xx.xx | xx.xx |       |
|                  |                  | Missing        | xx.xx | xx.xx | xx.xx |       |
|                  | <b>6 months</b>  | Mean           | xx.xx | xx.xx | xx.xx | xx.xx |
|                  |                  | N              | xx.xx | xx.xx | xx.xx |       |
|                  |                  | Std. Deviation | xx.xx | xx.xx | xx.xx |       |
|                  |                  | Median         | xx.xx | xx.xx | xx.xx |       |
|                  |                  | Minimum        | xx.xx | xx.xx | xx.xx |       |
|                  |                  | Maximum        | xx.xx | xx.xx | xx.xx |       |
|                  |                  | Missing        | xx.xx | xx.xx | xx.xx |       |
|                  | <b>12 months</b> | Mean           | xx.xx | xx.xx | xx.xx | xx.xx |
|                  |                  | N              | xx.xx | xx.xx | xx.xx |       |
|                  |                  | Std. Deviation | xx.xx | xx.xx | xx.xx |       |
| Median           |                  | xx.xx          | xx.xx | xx.xx |       |       |
| Minimum          |                  | xx.xx          | xx.xx | xx.xx |       |       |
| Maximum          |                  | xx.xx          | xx.xx | xx.xx |       |       |
| Missing          |                  | xx.xx          | xx.xx | xx.xx |       |       |
| <b>EQ-5D VAS</b> | <b>3 months</b>  | Mean           | xx.xx | xx.xx | xx.xx | xx.xx |
|                  |                  | N              | xx.xx | xx.xx | xx.xx |       |
|                  |                  | Std. Deviation | xx.xx | xx.xx | xx.xx |       |
|                  |                  | Median         | xx.xx | xx.xx | xx.xx |       |
|                  |                  | Minimum        | xx.xx | xx.xx | xx.xx |       |
|                  |                  | Maximum        | xx.xx | xx.xx | xx.xx |       |
|                  |                  | Missing        | xx.xx | xx.xx | xx.xx |       |
|                  | <b>6 months</b>  | Mean           | xx.xx | xx.xx | xx.xx | xx.xx |
|                  |                  | N              | xx.xx | xx.xx | xx.xx |       |
|                  |                  | Std. Deviation | xx.xx | xx.xx | xx.xx |       |
|                  |                  | Median         | xx.xx | xx.xx | xx.xx |       |
|                  |                  | Minimum        | xx.xx | xx.xx | xx.xx |       |
|                  |                  | Maximum        | xx.xx | xx.xx | xx.xx |       |
|                  |                  | Missing        | xx.xx | xx.xx | xx.xx |       |
|                  | <b>12 months</b> | Mean           | xx.xx | xx.xx | xx.xx | xx.xx |
|                  |                  | N              | xx.xx | xx.xx | xx.xx |       |
|                  |                  | Std. Deviation | xx.xx | xx.xx | xx.xx |       |
|                  |                  | Median         | xx.xx | xx.xx | xx.xx |       |
| Minimum          |                  | xx.xx          | xx.xx | xx.xx |       |       |
| Maximum          |                  | xx.xx          | xx.xx | xx.xx |       |       |

|  |  |         |       |       |       |  |
|--|--|---------|-------|-------|-------|--|
|  |  | Missing | xx.xx | xx.xx | xx.xx |  |
|--|--|---------|-------|-------|-------|--|

696

697

698

699 Still to do: add process variables table.

700

701

702

703

704

705 **9. AMENDMENTS**
