# Supplementary material
Source: PubMed Central journal article supplement (PMC5820712)
Supplement: jama-318-1767-s003.pdf [file jama-318-1767-s003.pdf]

## Supplementary Online Content

Costa ML, Achten J, Griffin J; for the FixDT trial investigators. Effect of locking plate fixation vs intramedullary nail fixation on 6-month disability among adults with displaced fracture of the distal tibia: the UK FixDT randomized clinical trial. *JAMA*. doi:10.1001/jama.2017.16429

**eTable 1.** Patient-Reported Outcome Measures: Summary Statistics, Unadjusted and Adjusted Treatment Effects at All Time Points Using Multiple Imputation

This supplementary material has been provided by the authors to give readers additional information about their work.

**eTable 1.** Patient-Reported Outcome Measures: Summary Statistics, Unadjusted and Adjusted Treatment Effects at All Time Points Using Multiple Imputation

| Outcome         | IM Nail<br>(n =161)    |                        | Locking Plate<br>(n =160) |                        | Difference in Means |                                |         |
|-----------------|------------------------|------------------------|---------------------------|------------------------|---------------------|--------------------------------|---------|
|                 | Mean (95% CI)          | Median (IQR)           | Mean (95% CI)             | Median (IQR)           | Unadjusted          | Adjusted (95% CI) <sup>†</sup> | P value |
| Primary Outcome |                        |                        |                           |                        |                     |                                |         |
| DRI             |                        |                        |                           |                        |                     |                                |         |
| 3 mo            | 44.6<br>(41.7 to 47.4) | 43.8<br>(32.8 to 53.8) | 51.9<br>(48.9 to 54.8)    | 50.3<br>(38.9 to 65.0) | 4.0                 | 7.5<br>(3.6 to 11.4)           | <0.001  |
| 6 mo            | 30.3<br>(27.0 to 33.8) | 26.0<br>(12.9 to 42.5) | 34.0<br>(30.3 to 37.6)    | 28.9<br>(15.3 to 50.4) | 8.4                 | 3.4<br>(-1.1 to 7.8)           | 0.15    |
| 12 mo           | 22.9<br>(19.6 to 26.2) | 21.7<br>(10.7 to 38.8) | 24.1<br>(20.6 to 27.6)    | 22.2<br>(12.9 to 42.9) | 0.9                 | 0.9<br>(-3.3 to 5.0)           | 0.68    |
| OMAS            |                        |                        |                           |                        |                     |                                |         |
| 3 mo            | 41.9<br>(38.8 to 45.0) |                        | 36.4<br>(33.3 to 39.6)    |                        | -6.3                | -6.1<br>(-10.4 to -1.8)        | 0.005   |
| 6 mo            | 61.9<br>(58.6 to 65.3) |                        | 57.5<br>(53.9 to 61.1)    |                        | -4.9                | -5.2<br>(-9.8 to -0.6)         | 0.03    |
| 12 mo           | 71.8<br>(68.7 to 75.0) |                        | 69.8<br>(66.3 to 73.1)    |                        | -3.0                | -2.7<br>(-7.1 to 1.7)          | 0.23    |
| EQ-5D           |                        |                        |                           |                        |                     |                                |         |
| 3 mo            | 0.55<br>(0.51 to 0.59) |                        | 0.51<br>(0.46 to 0.55)    |                        | -0.05               | -0.06<br>(-0.11 to -0.01)      | 0.04    |
| 6 mo            | 0.67<br>(0.63 to 0.71) |                        | 0.63<br>(0.59 to 0.67)    |                        | -0.05               | -0.05<br>(-0.10 to 0.00)       | 0.05    |
| 12 mo           | 0.73<br>(0.69 to 0.77) |                        | 0.73<br>(0.70 to 0.77)    |                        | 0.01                | -0.01<br>(-0.05 to 0.04)       | 0.78    |

Abbreviations: mo = months; SD = standard deviation; IM = intramedullary; CI = confidence interval; IQR = interquartile range; AUC = area under curve; DRI = disability rating index, 0 (no disability) to 100 (complete disability); OMAS = Olerud and Molander ankle score, 0 worst pain and function to 100 no pain and best function; EQ-5D = EuroQol health-related quality of life 3-level score, utility values in range -0.59 (worse possible health) to 1 (perfect health), where death is 0.

<sup>†</sup> Mixed effects regression model based on intention to treat analysis approach with allocated treatment group, age group and sex as fixed effects, and recruiting site as a random effect.
